# Supplementary material
Source: Springer Nature journal article supplement (https://www.springermedizin.de/resource/supplementary/12967_2011_829_MOESM2_ESM.pdf/9577136)

**PC-3**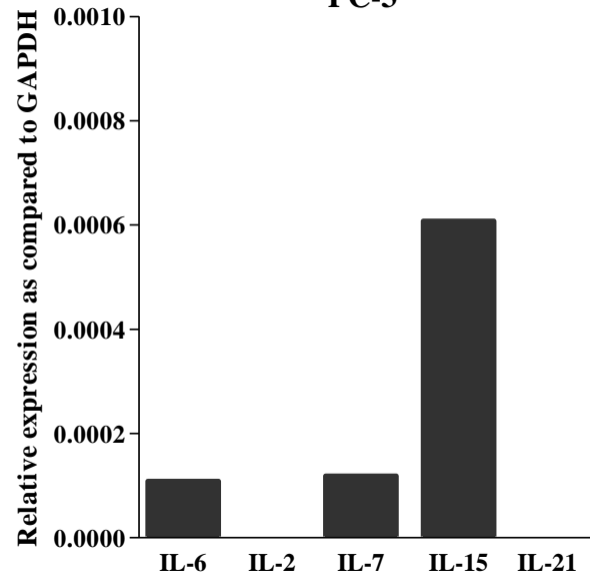**DU-145**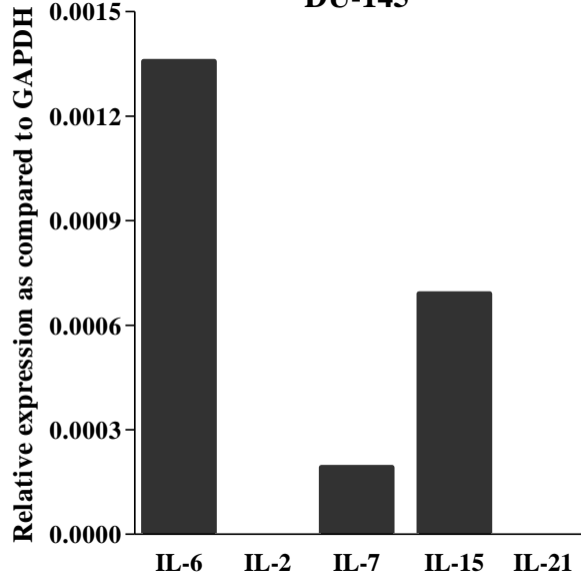**LNCaP**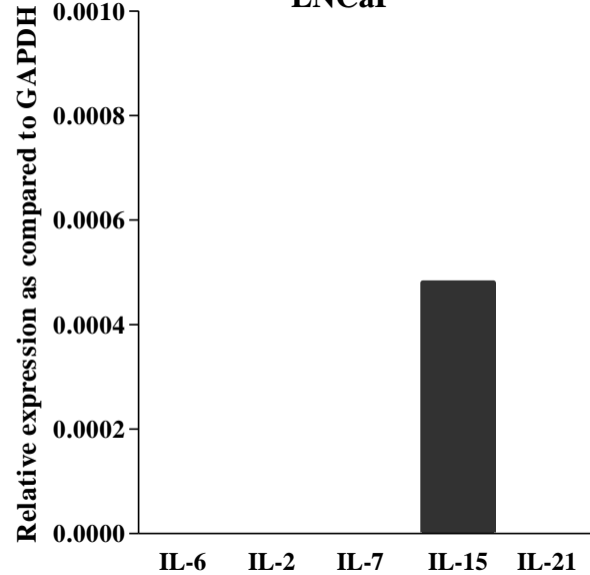

Supplement: MOESM2 [file 9577136]
